# Supplementary material for: High efficiency conjugated polymer/Si hybrid solar cells with tetramethylammonium hydroxide treatment
Source: Royal Society of Chemistry journal article supplement (doi:10.1039/c6ra24970a), 2017-01-01
Supplement: c6ra24970a1.pdf [file c6ra24970a1.pdf]

*Electronic Supplementary Information (ESI) for*

**High efficiency conjugated polymer/Si hybrid solar cells with tetramethylammonium hydroxide treatment**

Xiaojuan Shen,<sup>\*a</sup> Baogen Ma,<sup>a</sup> Ling Chen<sup>a</sup> and Jie Zhao<sup>\*b</sup>

<sup>a</sup>*Institute of Polymer Materials, School of Materials Science & Engineering, Jiangsu University, Zhenjiang, P.R. China.*

<sup>b</sup>*College of Physics, Optoelectronics and Energy & Collaborative Innovation Center of Suzhou Nano Science and Technology, Suzhou, P.R. China.*

*E-mail: xiaojuanshen@ujs.edu.cn; jzhao@suda.edu.cn*

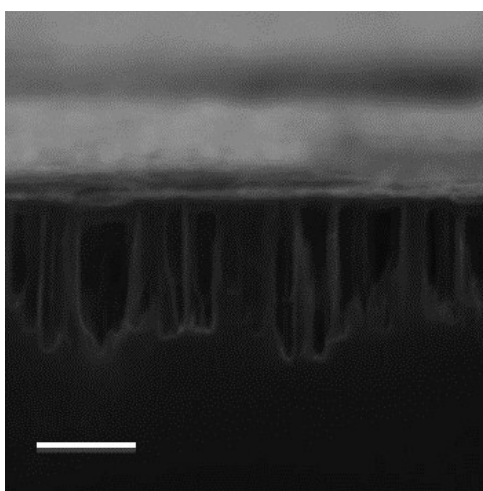

**Fig. S1** Cross-section SEM image of SiNWs covered with PEDOT:PSS layer. The scale bar is 200 nm.

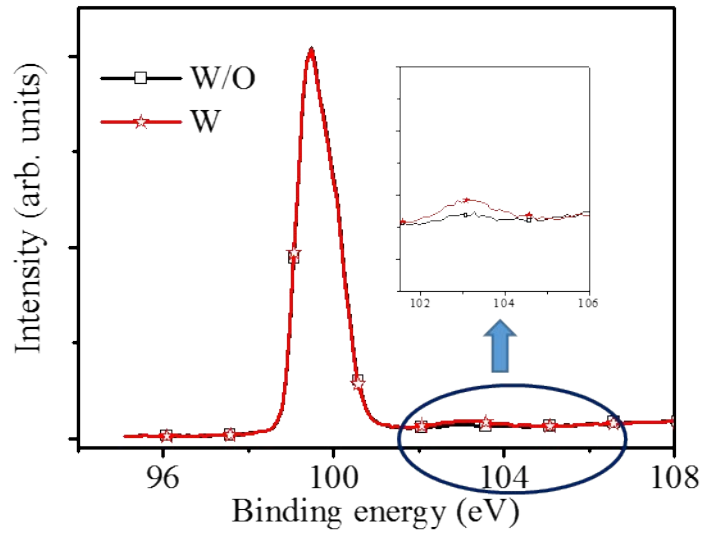

**Fig. S2** XPS measurements (in eV) of the Si substrate without (W/O, freshly prepared by HF) and with (W) TMAH treatment.

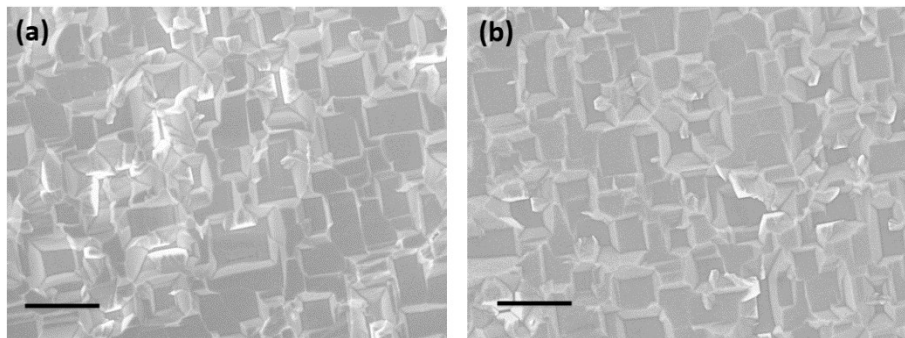

**Fig. S3** SEM images of the rear surface of SiNWs substrate (a) without and (b) with TMAH treatment. The scale bar is 200 nm.

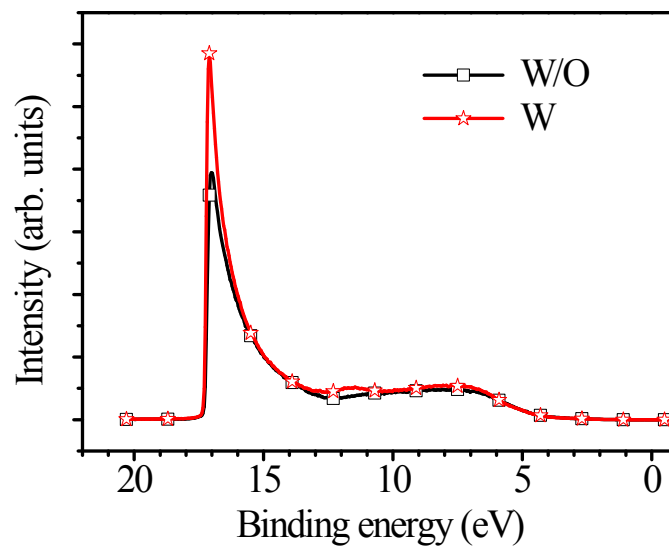

**Fig.S4** UPS analysis of silicon substrate without and with TMAH treatment

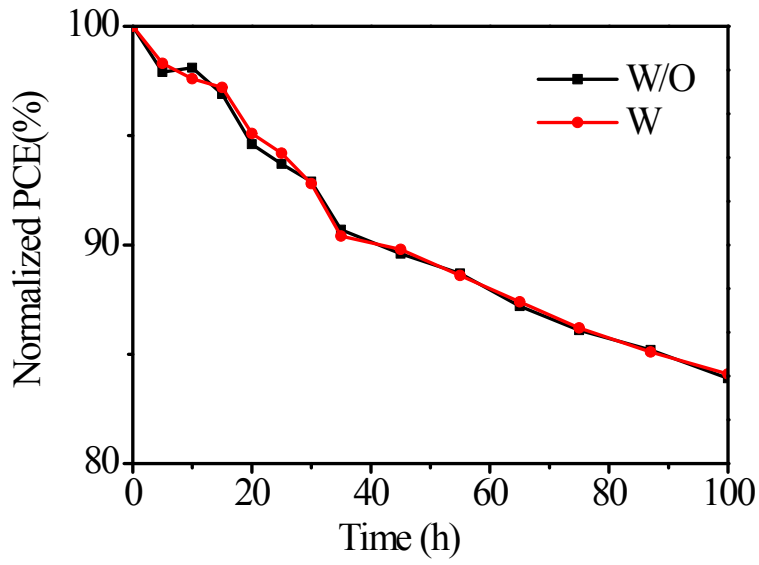

**Fig. S5** Stability measurement of the devices without and with TMAH treatment

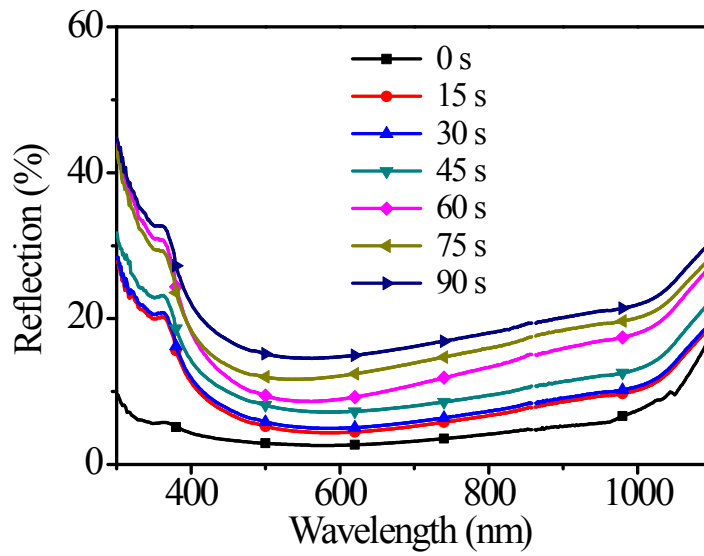

**Fig. S6** The reflection spectra of SiNWs with different TMAH treatment time.
